# Supplementary material for: The Nordic maintenance care program: maintenance care reduces the number of days with pain in acute episodes and increases the length of pain free periods for dysfunctional patients with recurrent and persistent low back pain - a secondary analysis of a pragmatic randomized controlled trial
Source: PubMed Central journal article supplement (PMC7171853; doi:10.1186/s12998-020-00309-6), 2020-04-21
Supplement: 12998_2020_309_MOESM1_ESM.pdf [file 12998_2020_309_MOESM1_ESM.pdf]

**Supplementary material 1:** Pain trajectories around visits, difference in mean (adjusted) number of days with bothersome pain between groups (Control – MC, 0-7).

| Treatment period     | All subjects |             |             |              | Adaptive Coper |              |             |              | Interpersonally Distressed |              |             |              | Dysfunctional |             |             |                  |
|----------------------|--------------|-------------|-------------|--------------|----------------|--------------|-------------|--------------|----------------------------|--------------|-------------|--------------|---------------|-------------|-------------|------------------|
|                      | Diff.        | L95CI       | U95CI       | p            | Diff.          | L95CI        | U95CI       | p            | Diff.                      | L95CI        | U95CI       | p            | Diff.         | L95CI       | U95CI       | p                |
| 3 weeks before       | 0.20         | -0.09       | 0.48        | 0.171        | -0.06          | -0.47        | 0.35        | 0.763        | -0.20                      | -0.77        | 0.38        | 0.499        | 0.49          | 0.06        | 0.92        | 0.026            |
| 2 weeks before       | 0.34         | 0.06        | 0.62        | 0.017        | -0.06          | -0.46        | 0.34        | 0.759        | -0.20                      | -0.77        | 0.37        | 0.497        | 0.69          | 0.27        | 1.12        | 0.001            |
| 1 week before        | 0.42         | 0.13        | 0.72        | 0.005        | -0.06          | -0.47        | 0.34        | 0.763        | -0.19                      | -0.77        | 0.39        | 0.521        | 0.81          | 0.36        | 1.26        | <0.001           |
| <b>Week of visit</b> | <b>0.46</b>  | <b>0.16</b> | <b>0.76</b> | <b>0.003</b> | <b>-0.06</b>   | <b>-0.47</b> | <b>0.35</b> | <b>0.765</b> | <b>-0.18</b>               | <b>-0.77</b> | <b>0.41</b> | <b>0.551</b> | <b>0.86</b>   | <b>0.39</b> | <b>1.32</b> | <b>&lt;0.001</b> |
| 1 week after         | 0.43         | 0.14        | 0.72        | 0.004        | -0.06          | -0.47        | 0.35        | 0.764        | -0.18                      | -0.76        | 0.39        | 0.533        | 0.82          | 0.37        | 1.27        | <0.001           |
| 2 weeks after        | 0.35         | 0.07        | 0.62        | 0.014        | -0.06          | -0.47        | 0.34        | 0.762        | -0.19                      | -0.74        | 0.37        | 0.513        | 0.70          | 0.28        | 1.12        | 0.001            |
| 3 weeks after        | 0.21         | -0.07       | 0.49        | 0.135        | -0.06          | -0.48        | 0.36        | 0.770        | -0.19                      | -0.74        | 0.36        | 0.500        | 0.51          | 0.08        | 0.94        | 0.020            |

**MC**, Maintenance Care; **Diff.**, Difference between groups; **L95CI**, Lower 95% confidence interval; **U95CI**, upper 95% confidence interval; **p**, p-value.
